# Supplementary material for: Trending peripheral venous PCO2 in patients with respiratory failure using mathematically arterialised venous blood gas samples
Source: HighWire-hosted journal article supplement (doi:10.1136/bmjresp-2021-000896), 2021-05-01
Supplement: bmjresp-2021-000896supp001_data_supplement.pdf [file bmjresp-2021-000896supp001_data_supplement.pdf]

## Appendix 1

### *Basic equations/principles*

(a)  $\text{pH} = 6.1 + \log (\text{HCO}_3^- / (0.03 \times \text{pCO}_2))$

(b)  $\log A/B = \log A - \log B$ ;  $\log A \times B = \log A + \log B$

(c) For change in pH driven by acute hypercapnoea, proportionate change in  $\text{pCO}_2 \gg$  than in  $\text{HCO}_3^-$  [23]

### *Change in pH*

Given (a)

$$\text{Change in pH} = 6.1 + \log ([\text{HCO}_3^- \text{ initial}] \times (\text{proportion new HCO}_3^- \text{ is of } [\text{HCO}_3^- \text{ initial}]) / (0.03 \times [\text{pCO}_2 \text{ initial}] \times (\text{proportion new pCO}_2 \text{ is of } [\text{pCO}_2 \text{ initial}]) - (6.1 + \log ([\text{HCO}_3^- \text{ initial}] / (0.03 \times [\text{pCO}_2 \text{ initial}])))$$

Given (b)

$$\text{Change in pH} = \log (\text{proportion new HCO}_3^- \text{ is of } [\text{HCO}_3^- \text{ initial}]) - \log (\text{proportion new pCO}_2 \text{ is of } [\text{pCO}_2 \text{ initial}])$$

Given (c)

$$\text{Change in pH driven by acute hypercapnoea} \approx - \log (\text{proportion post pCO}_2 \text{ is of } [\text{pCO}_2 \text{ initial}])$$
